1     **Genetic and phenotypic differentiation of lumpfish (*Cyclopterus lumpus*)**  
2     **across the North Atlantic: implications for conservation and aquaculture**

3  
4             Benjamin Alexander Whittaker, Sofia Consuegra, Carlos Garcia de Leaniz\*,

5  
6                     Centre for Sustainable Aquatic Research  
7                     Swansea University  
8             Singleton Park, Swansea, SA2 8PP, Wales, UK

9  
10  
11  
12             Corresponding author: [c.garciadeleaniz@swansea.ac.uk](mailto:c.garciadeleaniz@swansea.ac.uk)  
13  
14

15 **ABSTRACT**

16

17 Demand for lumpfish (*Cyclopterus lumpus*) has increased exponentially over the last decade,  
18 both for their roe, which is used as a caviar substitute, and increasingly also as cleaner fish to  
19 control sea lice in salmon farming. The species is classified as Near Threatened by the UICN  
20 and there are growing concerns that over-exploitation of wild stocks and translocation of  
21 hatchery-reared lumpfish may compromise the genetic diversity of native populations. We  
22 carried a comparative analysis of genetic and phenotypic variation across the species' range  
23 to estimate the level of genetic and phenotypic differentiation, and determined patterns of  
24 gene flow at spatial scales relevant to management. We found five genetically distinct  
25 groups located in the West Atlantic (USA, and Canada), Mid Atlantic (Iceland), East Atlantic  
26 (Faroe Islands, Ireland, Scotland, Norway, and Denmark), English Channel (England) and  
27 Baltic Sea (Sweden). Significant phenotypic differences were also found, with Baltic  
28 lumpfish growing more slowly, attaining a higher condition factor and maturing at a smaller  
29 size than North Atlantic lumpfish. Estimates of effective population size were consistently  
30 low across the NE Atlantic (Iceland, Faroe Islands, Norway), the area where most wild  
31 lumpfish are fished for their roe, and also for the aquaculture industry. Our study suggests  
32 that some lumpfish populations are very small and have low genetic diversity, which makes  
33 them particularly vulnerable to over-exploitation and genetic introgression. To protect them  
34 we advocate curtailing fishing effort, closing the breeding cycle of the species in captivity to  
35 reduce dependence on wild stocks, restricting the translocation of genetically distinct  
36 populations, and limiting the risk of farm escapes.

37

38 Key Words: translocation, conservation genetics, migration, aquaculture, cleaner fish

39

40

## 41 1. INTRODUCTION

42

43 The control of parasitic sea-lice (*Lepeophtheirus salmonis*) is one of the most pressing  
44 problems facing salmon farming (Torrissen et al. 2013; Treasurer 2002), as sea-lice have  
45 become resistant to chemical treatment (Aaen et al., 2015; Lees et al., 2008) and threaten the  
46 sustainability of the industry. Several species of cleaner fish have been used as an alternative  
47 to the use of antiparasitic therapeutants (Treasurer 2018), but the lumpfish (*Cyclopterus*  
48 *lumpus*) is probably the most useful as, in contrast to other cleaner fish like wrasse, it  
49 continues to feed on sea lice at low temperatures and is easy to rear in captivity (Imsland et  
50 al., 2014; Powell et al., 2017). Demand for lumpfish has increased exponentially since 2012  
51 (Powell et al., 2017; Treasurer, 2018). However, nearly all lumpfish used in salmon farming  
52 are still derived from wild broodstock (Jonassen et al., 2018a), and as they are generally used  
53 in a single salmon production cycle (Powell et al., 2017), satisfying aquaculture demands can  
54 put considerable pressure on wild stocks.

55

56 Lumpfish has been classified as Near Threatened in the IUCN Red List (Lorance et al. 2015),  
57 but information on the conservation status of different populations is very limited, and it is  
58 likely that some populations are already overexploited (Myers & Sjare, 1995; Powell et al.,  
59 2017). Ripe females have traditionally been targeted for their roe, which is processed and  
60 sold as a cheap alternative to caviar, and while the Icelandic and Greenland lumpfish fisheries  
61 are closely monitored, others are largely unregulated (Powell et al., 2017; Kousoulaki et al.,  
62 2018). A strong reduction in catch per unit effort has been detected in some lumpfish  
63 fisheries over the last 25 years (Lorance et al., 2015), and there are concerns that removing  
64 additional spawners for the expanding lumpfish aquaculture industry could impact on some  
65 small populations (Hedeholm et al., 2014; Powell et al. 2017, Powell et al., 2018), as it has  
66 been reported for other cleaner fish fisheries (Halvorsen et al., 2017).

67

68 Stock movements represent an additional risk to wild lumpfish as large numbers of hatchery-  
69 reared lumpfish are being translocated across the North Atlantic to supply salmon farms  
70 (Jonassen et al., 2018b; Treasurer et al., 2018) and this could pose a potential threat to local  
71 populations. For example, over 85% of all lumpfish deployed in Scotland during 2017  
72 originated from eggs imported from Iceland and Norway, and none came from local sources  
73 (Treasurer et al., 2018). In Ireland, 70% of lumpfish deployed during 2015-2016 were  
74 derived from eggs imported from Iceland and Norway (Bolton-Warberg et al., 2018), while in  
75 the Faroe Islands nearly all lumpfish used during 2014-2016 were of Icelandic origin  
76 (Steinarsson and Arnason, 2018; Johanssen et al., 2018). There is a danger that if non-native  
77 lumpfish escape from salmon farms they could interbreed with local populations and result in  
78 genetic introgression (Powell et al., 2017), as has been reported for farmed salmonids (e.g.  
79 Consuegra et al., 2011). Lumpfish translocations are likely to intensify in the near future  
80 (Jónsdóttir et al., 2017), and while escapes of lumpfish have not yet been reported, these  
81 seem largely inevitable in open salmon net-pens, as have already been documented for two  
82 species of wrasse (Jansson et al., 2017; Faust et al., 2018). Whether escapes can have a  
83 genetic impact on local lumpfish populations will depend on the number of escapees, their  
84 reproductive success, and the extent of genetic differentiation between local and introduced  
85 fish, but none of these parameters are currently known.

86

87 Lumpfish are distributed across a vast marine area, extending to both sides of the North  
88 Atlantic and into the Baltic (Davenport 1985; Powell et al., 2018), and there is thus scope for  
89 substantial differentiation. Soon after hatching, the larvae attach to the substrate using a  
90 specialized suction cup, which probably limits larval dispersal (Davenport, 1985). Tagging

91 studies suggest that, although adults can swim up to 49 km/day, some individuals remain  
92 within a restricted 80 km range after +250 days at liberty (Kennedy et al., 2015). There is  
93 also evidence of homing (Kennedy et al., 2014), which will favour reproductive isolation and  
94 may result in stock differentiation. For example, spawning time may vary by two months  
95 within single populations (Wittwer and Treasurer, 2018), but as much as seven months  
96 among populations, from January in the English channel (Powell et al., 2018) to August near  
97 the Arctic circle (Jónsdóttir et al., 2018). Population differences also exist in growth and  
98 delousing behaviour (Johannesen et al., 2018) and, as these are maintained under common  
99 rearing conditions (Imsland et al., 2016; Bolton-Warberg et al., 2018), they are likely to be  
100 inherited. Such differences suggest that lumpfish may form discrete populations, and that  
101 these may be adapted to local conditions. Yet, the extent of genetic differentiation in lumpfish  
102 is uncertain. Thus, while significant genetic differences have been found at large spatial  
103 scales (i.e. Canada vs Norway; Pampoulie et al., 2014), populations at smaller scales appear  
104 to be relatively homogenous. For example, lumpfish sampled in the English channel appear  
105 to be largely undifferentiated (Consuegra et al., 2015), as do fish sampled along the  
106 Norwegian coast (Jónsdóttir et al., 2017). In contrast, in Greenland two genetically distinct  
107 groups have been found in the north and south (Garcia-Mayoral et al., 2016) suggesting that  
108 there can also be some fine scale genetic structuring.

### 109 110 **1.1. Aims**

111  
112 The aims of our study were three. First, given their limited larval dispersal and evidence for  
113 homing, we hypothesised that lumpfish might display genetic isolation by distance, with  
114 populations closer together being more genetically similar than those further apart (Rousset  
115 1997). By sampling across the whole range, we aimed to estimate the level of genetic and  
116 phenotypic differentiation, and determine the patterns of gene flow across the species' range,  
117 at spatial scales relevant to management.

118  
119 Secondly, given the level of recent stock transfers, we wanted to know to what extent  
120 translocations could pose a potential genetic risk to local populations. For this, we provide  
121 genetic baselines on wild populations against which genetic introgression from farm escapees  
122 can be latter assessed, as done for Atlantic salmon (Gilbey et al., 2017).

123  
124 Finally, as some lumpfish populations may be endangered, we provide estimates of effective  
125 population size, and test for the existence of genetic bottlenecks to better understand their  
126 conservation status and the extent to which gene flow could mitigate the impacts of over-  
127 exploitation.

128

## 129 2. MATERIAL AND METHODS

130

### 131 2.1. Collection of samples

132 Fin tissue was obtained from 410 lumpfish originating from 15 sites across the species' range  
133 (Table 1) and were stored in 96% ethanol at -20°C until analysis. Sites located within an 80  
134 km radius (the estimated maximum range of dispersal, Kennedy et al., 2015) were pooled  
135 together to minimise the risk of spatial pseudo-replication. Samples were pooled from the  
136 Faroe Islands (Klasvík and Kollafjørður, c. 20km), Denmark (Køge Bay and Mosede Havn,  
137 c. 13km) and Sweden (survey hauls from Bornhölm to Öland, and from Gotland to Gotska  
138 Sandön). Pooled groups were named after the site contributing the largest number of samples.  
139 Biometric data on length (mm) and weight (g) were available for eight of the 15 sites (Table  
140 1).

141

### 142 2.2. DNA extraction and amplification

143 DNA was extracted using the Nexttec Isolation kit (Nexttec, UK) following the  
144 manufacturer's protocol. The concentration of extracted DNA was quantified using a  
145 Nanodrop 2000 (Thermo Fisher Scientific Inc., USA) and diluted with DNA free water to  
146 50ng/µl where necessary. A 2µl of sample DNA was used for amplification using a QIAGEN  
147 Multiplex PCR kit (QIAGEN, UK) in a total reaction volume of 9µl. Ten microsatellite loci  
148 (*Clu29*, *Clu34*, *Clu36*, *Clu45* and *Clu12*, *Clu26*, *Clu33*, *Clu37*, *Clu40*, *Clu44* (Skirnisdottir et  
149 al., 2013) were genotyped in two separate multiplex reactions (Table S1). Amplification  
150 consisted of a single initial activation step at 95°C for 15 minutes followed by eight cycles of  
151 touchdown PCR denaturation at 94°C for 30 seconds, annealing from 64°C or 60°C to 56°C in  
152 descending two-cycle steps of 2°C and an extension at 72°C for 90 seconds, 24 additional  
153 cycles with an annealing temperature of 56°C and a single final extension at 60°C for 30  
154 minutes. An Applied Biosystems ABI3130xl Genetic Analyser (Applied Biosystems, UK)  
155 was used to resolve the fragments using GeneScan 500-LIZ(-250) as a size standard.  
156 Fragment length was established using GeneMapper v5.0 (Applied Biosystems, UK).  
157 Genotyping consistency was validated by repeating PCR, fragment analysis and scoring for  
158 10% of samples.

159

### 160 2.3. Estimates of genetic diversity

161 We used Microchecker v2.2.3 (Van Oosterhout et al., 2004) to identify null alleles, allele  
162 dropout and stutter peaks, and Bayescan v2.1 (Foll & Gaggiotti, 2008) to test for loci  
163 neutrality. GENEPOP v4.2 (Rousset, 2008) was used to test for linkage disequilibrium,  
164 deviations from Hardy-Weinberg equilibrium, and to calculate allelic frequencies across  
165 populations. GeneAIEx v6.502 (Peakall & Smouse, 2012) was used to assess the number of  
166 alleles ( $N_A$ ), effective alleles ( $N_E$ ), private alleles ( $N_{PA}$ ), expected heterozygosity ( $H_E$ ),  
167 observed heterozygosity ( $H_O$ ), and to carry out a Mantel test of genetic isolation by distance.

168

### 169 2.4. Population genetic structure and patterns of migration

170 We conducted an Analysis of Molecular Variance (AMOVA) to partition genetic variation at  
171 three hierarchical levels (among populations, within populations, and among individuals),  
172 and calculated pairwise  $F_{ST}$  values between populations using Arlequin v3.5.2.2. (Excoffier  
173 & Lischer, 2010). A Bayesian cluster analysis was conducted in STRUCTURE v2.3.4  
174 (Falush et al., 2007; Hubisz et al. 2009; Pritchard et al., 2000) to estimate the most likely  
175 number of genetic clusters (K) informed by individual genotypes. Admixture models with K  
176 values ranging from 2 to 15 were considered using twenty iterations, a burn-in length of  
177 10,000 and 50,000 Markov Chain Monte Carlo repeat simulations to quantify the likelihood  
178 of each K value. Results were fed into STRUCTURESELECTOR (Li & Liu, 2018) to

179 identify the most likely number of clusters present based on the median of means  
180 (MedMeaK), maximum of means (MaxMeaK), median of medians (MedMedK) and  
181 maximum of medians (MaxMedK) criteria (Puechmaille, 2016). Bayesian cluster analysis  
182 informed by spatial data was conducted using TESS v2.3.1 (Chen et al., 2007) to better  
183 understand the extent of spatial genetic structure. Admixture models were run with 50,000  
184 total sweeps, 10,000 burn-in sweeps, and 200 runs per  $K_{\max}$  ranging from 2 to 15. The  
185 average Deviance Information Criterion (DIC) of the lowest 10 DIC values was calculated  
186 for each  $K_{\max}$  to assess the most likely number of clusters. Runs within 10% of the lowest  
187 (DIC) for a given  $K_{\max}$  were used for analysis. CLUMMP v1.1.2 (Jakobsson & Rosenberg,  
188 2007) was used to average variation between repeated iterations for the most likely K values,  
189 and the resulting output was visualised using DISTRUCT v1.1.1 (Rosenberg, 2004). A  
190 neighbour joining tree assessing the genetic distance of populations was constructed with  
191 Populations v1.2.32 (Langella, 2002) using Nei's standard genetic distance with 1,000  
192 bootstraps per locus and the resulting tree was visualised using TreeView (Page, 2003). The  
193 effective number of migrants ( $N_m$ ) and extent of asymmetrical migration were calculated  
194 using div-Migrate (Sundqvist et al., 2016). A matrix was created using 5,000 bootstrap  
195 iterations under three alpha values to simulate high ( $\alpha = 0.05$ ), moderate ( $\alpha = 0.005$ ) and low  
196 ( $\alpha = 0.0025$ ) levels of gene flow.

197

## 198 **2.5. Effective population size, population expansion and evidence of genetic bottlenecks**

199 Estimates of effective population size ( $N_e$ ) for sites containing at least 19 individuals were  
200 calculated using the Linkage Disequilibrium Model (LDM) with a critical value of 0.02 in  
201 NeEstimator v2.1 (Do et al., 2014). Evidence of population expansion was assessed through  
202 the  $k$  intralocus and  $g$  interlocus tests (Reich et al., 1998), using the application provided in  
203 Bilgin (2007). Evidence of genetic bottlenecks was evaluated in Bottleneck v2.1 (Cornuet &  
204 Luikart, 1996) using 1,000 replicates and according to the Two-Phase (TPM) and the  
205 Stepwise (SMM) Mutation Models.

206

## 207 **2.6. Phenotypic variation**

208 Variation in the length-weight relationship between regions (West Atlantic,  $n = 30$ ; East  
209 Atlantic,  $n = 65$ ; English Channel,  $n = 60$ ; Baltic Sea,  $n = 40$ ), was examined by regression  
210 analysis on log-transformed data. We calculated relative weight ( $W_r$ ) as the ratio of the  
211 observed weight divided by the predicted weight (from the regression obtained above) to  
212 obtain an index of body condition that is more appropriate for fish like lumpfish that have an  
213 unusual body shape (Nahdi et al., 2016). The most plausible number of age classes  
214 represented in the samples, and the mean size at age (Macdonald & Pitcher, 1979) were  
215 calculated through mixture analysis of length-frequency data using PAST v3.17 (Hammer et  
216 al, 2001). The Von Bertalanffy growth equation (Kirkwood, 1983) was fitted to estimate  
217 growth parameters in each region.

218

219

220

221

222

223

224

225

226

227

228



## 229 3. RESULTS

230

### 231 3.1. Population genetic diversity

232 All microsatellites exhibited polymorphism. The mean number of alleles ( $N_A$ ) ranged from  
233 4.5 (Ro) to 6.8 (Kl, VB), mean expected heterozygosity ( $H_E$ ) ranged from 0.592 (Öl) to 0.700  
234 (Kl), and mean  $F_{IS}$  varied from -0.056 (Ro) to 0.110 (Öl) across all loci (Table 1). Initial  
235 analysis suggested that null alleles might be present at multiple loci (*Clu34*, *Clu36*, *Clu12*,  
236 *Clu33*, *Clu37* and *Clu40*, Table S2). However, repeatedly removing each locus in turn  
237 showed little variation in  $F_{ST}$  values (Tables S3-S8), and therefore all markers were retained  
238 for further analyses. No evidence of departures from neutrality or linkage disequilibrium was  
239 found after Bonferroni corrections for multiple tests (Rice, 1989). Deviations from Hardy-  
240 Weinberg equilibrium (HWE) were detected at 5 of the 15 sites (Table 1), but these involved  
241 only 12% of loci after Bonferroni correction (Table S9). The mean number of private alleles  
242 ( $N_{PA}$ ) was relatively low, ranging from 0.00 to 0.40, with sites in the West Atlantic (FB =  
243 0.30, WB = 0.40) and Baltic Sea (GS = 0.30) showing the highest values.

244

### 245 3.2. Population structure and gene flow

246 Global  $F_{ST}$  was 0.095 ( $P < 0.001$ ) indicating a moderate but significant degree of genetic  
247 differentiation. Results of AMOVA indicated that 83.5% of molecular variation was due to  
248 variation within individuals, 7% amongst individuals within populations, and 9.5% amongst  
249 populations. Pairwise  $F_{ST}$  showed a significant level of genetic differentiation across most  
250 populations (Table 2), but populations closer together were genetically similar after  
251 Bonferroni correction. On the basis of  $F_{ST}$  values, the strongest differentiation was found  
252 between West Atlantic and Baltic Sea populations. Results of a Mantel test support the  
253 existence of a significant, albeit weak, isolation by distance ( $R^2 = 0.1229$ ,  $P = 0.01$ ).  
254 The most likely number of genetically distinct groups ( $K$ ) ranged from  $K = 5$  (MedMedK,  
255 MedMeaK) to  $K = 6$  (MaxMedK, MaxMeaK) using STRUCTURESELECTOR (Figure S1).  
256 Spatial cluster analysis using TESS suggested a  $K_{max} = 10$  (Figure S2), though only six of  
257 these genetic groups showed substantial representation, and four groups contributed only  
258 3.3% to the genetic background. Distinct clusters were detected in the West Atlantic and  
259 Baltic Sea by both STRUCTURE and TESS, with a greater level of admixture across the East  
260 Atlantic (Figure 1). Results were consistent in attributing a genetically unique pattern to the  
261 Mid Atlantic, English Channel clusters and a Norwegian site at Averøy. A neighbourhood  
262 joining tree (Figure 2) showed similar patterns to that of the structuring analyses, highlighting  
263 the separation between the West Atlantic and Baltic Sea populations, and the higher degree of  
264 admixture within the East Atlantic group.

265

266 The effective number of migrants ( $N_m$ ) ranged from 1.00 between sites in the English  
267 Channel to 0.03 between sites in the West Atlantic and Baltic Sea. The exchange of migrants  
268 was much higher within genetic clusters than among clusters (Table S10), with the highest  
269 levels of gene flow found within the East Atlantic and within the English Channel (Figure 3).  
270 The only evidence of moderate asymmetric gene flow was from Norway towards the Faroe  
271 Islands ( $N_m = 0.507$ ), but this was only detected at  $\alpha = 0.05$ , and not at the lower  $\alpha$ -values  
272 (0.005 or 0.0025).

273

### 274 3.3. Effective population size, population expansion and evidence of genetic bottlenecks

275 Estimates of effective population size ( $N_e$ ) based on a Linkage Disequilibrium Model (LDM)  
276 varied from 19 (Norway) to 70,148 (Denmark; Table S11). Sites with low  $N_e$  values (<75)  
277 were found across Iceland, Faroe Islands and Norway (Figure 3). No evidence of recent  
278 population expansions was found according to the intra-locus  $k$  and inter-locus  $g$  tests (Table

279 S12). A significant deficiency of heterozygotes was identified in Ireland and Scotland using  
280 the Single Mutation Model (SMM) in BOTTLENECK (Wilcoxon signed-rank test,  $P =$   
281 0.0033 after Bonferroni correction), suggesting that these populations could have undergone  
282 a recent genetic bottleneck (Table S13), but this was not detected by the Two-Phase Model of  
283 Mutation (TPM).

284

### 285 **3.4. Phenotypic variation**

286 The relationship between length and weight differed significantly between regions ( $F_{4,192} =$   
287 917.2,  $P < 0.001$ ; Figure 4). Lumpfish in the Baltic Sea were heavier relative to their size  
288 than lumpfish in the East Atlantic and the English Channel (pairwise comparisons: Baltic -  
289 East Atlantic, estimate =  $-0.090 \pm 0.036$ ,  $t = -2.530$ ,  $P = 0.012$ ; Baltic - English Channel,  
290 estimate =  $-0.145 \pm 0.046$ ,  $t = -3.171$ ,  $P = 0.002$ ), but were similar to those in the West  
291 Atlantic (pairwise comparison Baltic - West Atlantic, estimate =  $-0.094 \pm 0.050$ ,  $t = -1.891$ ,  $P$   
292 = 0.060). The relative weight of lumpfish differed between regions ( $F_{3,191} = 2.841$ ,  $P =$   
293 0.039) and was highest in the Baltic Sea and the West Atlantic, and lowest in the East  
294 Atlantic and the English Channel.

295

296 Mixture analysis identified multiple plausible age classes present amongst lumpfish sampled  
297 in the Baltic Sea (7 age classes), East Atlantic (4 age classes) and English Channel (3 age  
298 classes), but only a single plausible age class in the West Atlantic. Based on the parameters of  
299 the Von Bertalanffy Growth equation, the maximum age was estimated to be 6.0 years for  
300 Baltic populations, 5.7 yrs for populations in the East Atlantic and 7.5 yrs for southern  
301 populations spawning in the English Channel. Fitted growth equations differed significantly  
302 between regions (Table 3), with lumpfish in the Baltic Sea showing the slowest growth and  
303 those in the English Channel showing the fastest.

304

305



#### 306 4. DISCUSSION

307

308 Our study reveals a significant degree of structuring in lumpfish populations which is  
309 consistent with moderate isolation by distance, and should inform the translocation of  
310 lumpfish across salmon farms. Genetically distinct groups were found in the West Atlantic  
311 (USA, Canada), Mid Atlantic (Iceland), East Atlantic (Faroe Islands, Ireland, Scotland,  
312 Norway, Denmark), English Channel (England), Averøy (Norway) and Baltic Sea (Sweden).  
313 Whilst significant gene flow was detected within each of these groups, little exchange of  
314 migrants was found between these areas. Our results also indicate the existence of significant  
315 phenotypic differences across the range, that mimic to some extent the observed genetic  
316 differences. Thus, lumpfish from the Baltic Sea were not only genetically distinct, they were  
317 also found to be smaller, grow at a slower rate and weigh more relative to their size than  
318 lumpfish from the North Atlantic. Although our growth estimates were based on length  
319 frequency data and did not distinguish between males and females, they are in line with  
320 estimates based on mark and recapture studies in Norway and Iceland ( $L_{\infty} = 527 \pm 64$  mm,  $K$   
321  $= 0.26 \pm 0.14$  year<sup>-1</sup>; Kasper et al., 2014), and suggest that Baltic lumpfish grow more  
322 slowly and mature at a much smaller size (c. 150 g) than lumpfish from the North Atlantic  
323 (2.0-3.0 Kg). The slow growth shown by Baltic lumpfish may be of interest for selective  
324 breeding programmes in aquaculture, as slow growing cleaner fish may be better suited for  
325 feeding on sea lice (Powell et al., 2017).

326

327 Pampoulie et al. (2014) first suggested that lumpfish in the West and East Atlantic were  
328 separated by cold southward polar currents, and that populations in the Baltic Sea may have  
329 become isolated during the Last Glacial Maximum. Though our analysis supports this broad  
330 division, it also indicates a finer population structure, revealing that lumpfish in the mid  
331 Atlantic and English Channel are genetically distinct from other populations. The conclusion  
332 of our genetic analyses is consistent with recent tagging studies in Norway and Iceland  
333 showing that whilst lumpfish can move offshore to feed, they return to spawn in their home  
334 waters (Kennedy et al., 2015; Kennedy et al., 2016) and do not migrate between Iceland and  
335 Norway (Kasper et al., 2014). There is little information on southern lumpfish populations,  
336 though lumpfish in the English Channel appear to spawn earlier in the season than  
337 populations further north (Powell et al., 2018), probably due the warmer temperatures and  
338 better feeding opportunities, which are known to influence maturation and spawning of  
339 lumpfish (Hedeholm et al., 2017). It is thus possible that the warmer waters found at the  
340 species' southern range may favour an early spawning and lead to some degree of  
341 reproductive isolation, hence limiting gene flow along a latitudinal gradient. With the  
342 exception of the Averøy population, the remaining sites in the East Atlantic appear to be  
343 genetically uniform, as reported along the Norwegian coast (Jónsdóttir et al., 2017).

344

345 The level of genetic diversity, and therefore the ability to adapt and respond to selection,  
346 differed substantially among regions. Our estimates of effective population size, the first for  
347 this species, were particularly low across the North East Atlantic (Iceland,  $N_e = 43$ ; Faroe  
348 Islands,  $N_e = 30$ ; Norway, mean  $N_e = 51$ ), and some evidence of genetic bottlenecks was also  
349 detected at sites in Ireland and Scotland, though the evidence for this was not strong. The  
350 North East Atlantic supports the largest lumpfish roe fishery (Jónsdóttir et al., 2018), with a  
351 production of 4,000 tonnes of roe per year (Johannesson, 2006). Given a maximum yield of  
352 c. 4kg roe/female (Johannesson, 2006), this level of harvest likely surpasses 1 million mature  
353 females every year. Harvesting for lumpfish roe is both size and sex-selective, which  
354 increases the vulnerability of populations to over-exploitation (Hoenig & Hewitt, 2005;  
355 Ratner & Lande, 2001) and may explain the low estimates of effective population size found

356 across this area. The North East Atlantic populations appear to be small and reducing  
357 pressure on these stocks would decrease the risk of over exploitation.

358

#### 359 **4.1. Conclusions and management implications**

360 By 2020 c. 50 million lumpfish will be required by the salmon farming industry (Powell et  
361 al., 2017; Treasurer, 2018) and most of these will come from the stripping of wild broodstock  
362 (Wittwer & Treasurer, 2018) caught in Iceland and Norway, and then shipped as eggs or  
363 larvae to salmon farms elsewhere. Information on lumpfish escapees is lacking but corks  
364 wrasse (*Symphodus melops*) deployed as cleaner fish in Norway have recently been found to  
365 escape and hybridise with local populations (Faust et al., 2018), and the same could happen  
366 with lumpfish. Efforts should thus be made to reduce the risk of lumpfish escaping from fish  
367 farms and interbreeding with local populations, as high propagule pressure associated with  
368 open-net pens is the single most important factor determining the impact of escapees  
369 (Consuegra et al., 2011).

370

371 Our study suggests that lumpfish translocations should be restricted within genetically  
372 homogenous groups to reduce the risk of genetic introgression between native and non-native  
373 populations. In this sense, lumpfish from some areas of Norway, and particularly from  
374 Iceland, may be ill-suited for deployment in Ireland, Scotland and the Faroe Islands, and  
375 vice-versa. Ultimately, closing the breeding cycle of the species in captivity, and producing  
376 sterile lumpfish for deployment in salmon farms, must be a research priority for both the  
377 conservation of the species and the cleaner fish industry (Powell et al., 2017), as this will  
378 lessen dependency on wild broodstock and reduce the risk of genetic introgression.

379

380

381

382 **ACKNOWLEDGMENTS**

383 This work was partially funded by Marine Harvest Scotland through the LUMPFISH project  
384 and the Welsh Government via the European Regional Development Fund (SMARTAQUA  
385 Operation). We are indebted to Majbritt Bolton-Warberg, Danny Boyce, Werner Forster,  
386 Gus Galloway, Ása Johannesen, Lars Jørgen Ulvan, Niklas Larson, Marine Harvest Scotland,  
387 Michael Pietrak, Adam Rainsden and Peter Rask for supplying tissue samples. We are also  
388 grateful to Chloe Robinson, Niall Coates, Christine Gray, Craig Pooley and Ian Tew for  
389 assistance in optimising primers and processing samples.

390

391 **DECLARATION OF INTEREST**

392 The authors declare no conflict of interest

393

394 **AUTHORS' CONTRIBUTIONS**

395 CGL and SC designed the study, wrote the project and secured the funding. BAW processed  
396 the samples and carried out the genetic analysis with assistance from SC. BAW and CGL  
397 wrote the MS with input from SC. BAW and CGL carried out the statistical analysis. All  
398 authors approved the final submission.

399

400

## 401 5. REFERENCES

402

403 Aaen, S. M., Helgesen, K. O., Bakke, M. J., Kaur, K., & Horsberg, T. E. (2015). Drug  
404 resistance in sea lice: A threat to salmonid aquaculture. *Trends in Parasitology* **31**: 72-  
405 81.

406 Bilgin, R. (2007). Kgtests: A simple Excel Macro program to detect signatures of population  
407 expansion using microsatellites: Program note. *Molecular Ecology Notes* **7**: 416–417.

408 Bolton-Warberg, M., O'Sullivan, S.M., Power, A.M., Moore, A.I., Wilson, L., Sproll, F.,  
409 Schlittenhardt, S., Yusof, M.F.B.M., D'Arcy, J., Jackson, D., Fitzpatrick, R., (2018).  
410 Cleaner fish use in Ireland. In *Cleaner Fish Biology and Aquaculture Applications*. ed.  
411 J.W. Treasurer, pp. 386-413. 5M Publishing Ltd., Sheffield.

412 Chen, C., Durand, E., Forbes, F., & François, O. (2007). Bayesian clustering algorithms  
413 ascertaining spatial population structure: A new computer program and a comparison  
414 study. *Molecular Ecology Notes*, *7*, 747–756.

415 Consuegra, S., Phillips, N., Gajardo, G., & Garcia De Leaniz, C. (2011). Winning the  
416 invasion roulette: Escapes from fish farms increase admixture and facilitate  
417 establishment of non-native rainbow trout. *Evolutionary Applications*, *4*(5), 660–671.

418 Consuegra S, Pooley C, Powell A, Keay A, Galloway G, Cockerill D et al. (2015) A  
419 traceability and genetic screening programme for sustainable breeding of lumpfish  
420 (*Cyclopterus lumpus*) for sea lice control in salmon farming. Proceedings of the  
421 Aquaculture Europe 2015, Rotterdam, 2015. European Aquaculture Society City, pp.  
422 167.

423 Cornuet, J. M., & Luikart, G. (1996). Description and power analysis of two tests for  
424 detecting recent population bottlenecks from allele frequency data. *Genetics*, *144*(4),  
425 2001–2014.

426 Davenport, J. (1985). *Synopsis of biological data on the lumpsucker Cyclopterus lumpus*  
427 (*Linnaeus, 1758*). *FAO Fisheries Synopsis* (Vol. 147).

428 Do, C., Waples, R. S., Peel, D., Macbeth, G. M., Tillett, B. J., & Ovenden, J. R. (2014).  
429 NeEstimator v2: Re-implementation of software for the estimation of contemporary  
430 effective population size (Ne) from genetic data. *Molecular Ecology Resources*, *14*(1),  
431 209–214.

432 Excoffier, L., & Lischer, H. E. L. (2010). Arlequin suite ver 3.5: A new series of programs to  
433 perform population genetics analyses under Linux and Windows. *Molecular Ecology*  
434 *Resources*, *10*(3), 564–567.

435 Falush, D., Stephens, M., & Pritchard, J. K. (2003). Inference of population structure using  
436 multilocus genotype data: Linked loci and correlated allele frequencies. *Genetics*,  
437 *164*(4), 1567–1587.

438 Falush, D., Stephens, M., & Pritchard, J. K. (2007). Inference of population structure using  
439 multilocus genotype data: Dominant markers and null alleles. *Molecular Ecology Notes*,  
440 *7*(4), 574–578.

441 Faust, E., Halvorsen, K. T., Andersen, P., Knutsen, H., & André, C. (2018). Cleaner fish  
442 escape salmon farms and hybridize with local wrasse populations. *Royal Society Open*  
443 *Science*, *5*(3), 171752.

444 Foll, M., & Gaggiotti, O. (2008). A genome-scan method to identify selected loci appropriate  
445 for both dominant and codominant markers: A Bayesian perspective. *Genetics*, *180*(2),  
446 977–993.

447 Garcia-Mayoral, E., Olsen, M., Hedeholm, R., Post, S., Nielsen, E. E., & Bekkevold, D.  
448 (2016). Genetic structure of West Greenland populations of lumpfish *Cyclopterus*  
449 *lumpus*. *Journal of Fish Biology*, *89*(6), 2625–2642.

450 Gilbey J, Coughlan J, Wennevik V, Prodöhl P, Stevens JR, Garcia de Leaniz C, Ensing D,

- 451 Cauwelier E, Cherbonnel C, Consuegra S et al. (2017). A microsatellite baseline for  
452 genetic stock identification of European Atlantic salmon (*Salmo salar* L.). *ICES Journal*  
453 *of Marine Science* 75, 662-674.
- 454 Halvorsen, K. T., Larsen, T., Sjørdalen, T. K., Vøllestad, L. A., Knutsen, H., & Olsen, E. M.  
455 (2017). Impact of harvesting cleaner fish for salmonid aquaculture assessed from  
456 replicated coastal marine protected areas. *Marine Biology Research*, 13(4), 359–369.
- 457 Hammer, Ø., Harper, D. A. T. a. T., & Ryan, P. D. (2001). PAST: Paleontological Statistics  
458 Software Package for Education and Data Analysis. *Palaeontologia Electronica*,  
459 4(1)(1), 1–9.
- 460 Hedeholm, R. B., Post, S., & Grønkjær, P. (2017). Life history trait variation of Greenland  
461 lumpfish (*Cyclopterus lumpus*) along a 1600 km latitudinal gradient. *Polar Biology*,  
462 40(12), 2489–2498.
- 463 Hoenig, J. M., & Hewitt, D. A. (2005). What Can We Learn about Mortality from Sex Ratio  
464 Data? A Look at Lumpfish in Newfoundland. *Transactions of the American Fisheries*  
465 *Society*, 134(3), 754–761.
- 466 Hubisz, M. J., Falush, D., Stephens, M., & Pritchard, J. K. (2009). Inferring weak population  
467 structure with the assistance of sample group information. *Molecular Ecology*  
468 *Resources*, 9(5), 1322–1332.
- 469 Imsland, A. K., Reynolds, P., Eliassen, G., Hangstad, T. A., Nytrø, A. V., Foss, A., ...  
470 Elvegård, T. A. (2014). Notes on the behaviour of lumpfish in sea pens with and without  
471 Atlantic salmon present. *Journal of Ethology*, 32(2), 117–122.
- 472 Imsland AK, Reynolds P, Eliassen G, Mortensen A, Hansen ØJ, Puvanendran V, Hangstad  
473 TA, Jónsdóttir ÓDB, Emaus P-A, Elvegård TA et al. (2016). Is cleaning behaviour in  
474 lumpfish (*Cyclopterus lumpus*) parentally controlled? *Aquaculture* 459: 156-165.
- 475 Jakobsson, M., & Rosenberg, N. A. (2007). CLUMPP: A cluster matching and permutation  
476 program for dealing with label switching and multimodality in analysis of population  
477 structure. *Bioinformatics*, 23(14), 1801–1806.
- 478 Jansson, E., Quintela, M., Dahle, G., Albrechtsen, J., Knutsen, H., André, C., ... Glover, K. A.  
479 (2017). Genetic analysis of goldsinny wrasse reveals evolutionary insights into  
480 population connectivity and potential evidence of inadvertent translocation via  
481 aquaculture. *ICES Journal of Marine Science*, 74, 2135–2147.
- 482 Johannesson, J. (2006). Lumpfish caviar- from vessel to consumer. *FAO Fisheries Technical*  
483 *Paper. No. 485*, 71.
- 484 Jonassen T., Remen M., Lekva A., Steinarsson A. and Árnason T. (2018a). Transport of  
485 lumpfish and wrasse. in *Cleaner Fish Biology and Aquaculture Applications (ed.*  
486 *Treasurer J.)* 16, 319-335. 5M Publishing Ltd. Sheffield.
- 487 Jonassen T.M., Lein I. and Nytrø A.V. (2018b). Hatchery management of lumpfish. in  
488 *Cleaner Fish Biology and Aquaculture Applications (ed. Treasurer J.)*, 7, 122-146. 5M  
489 Publishing Ltd. Sheffield
- 490 Johannesen, Á., Arge, R., and Eliassen, K. (2018). Rearing, farm application and behaviour of  
491 lumpfish (*Cyclopterus lumpus*) in the Faroes. *Cleaner Fish Biology and Aquaculture*  
492 *Applications (Ed. JW Treasurer)*, 435–449. 5M Publishing Ltd. Sheffield
- 493 Jónsdóttir, Ó. D. B., Schregel, J., Hagen, S. B., Tobiassen, C., Aarnes, S. G., & Imsland, A.  
494 K. D. (2017). Population genetic structure of lumpfish along the Norwegian coast:  
495 aquaculture implications. *Aquaculture International*, (1), 1–12.
- 496 Jónsdóttir Ó.D.B., Imsland A.K. and Kennedy J. (2018). Lumpfish biology, genetics, use of  
497 microsatellites and SNP for population genetics and parental assignment, seek for QTLs.  
498 in *Cleaner Fish Biology and Aquaculture Applications (ed. Treasurer J.)*, 12, 218-228.  
499 5M Publishing Ltd. Sheffield
- 500 Kasper, J. M., Bertelsen, B., Ólafsson, H. G., Holst, J. C., Sturlaugsson, J., & Jónsson, S. P.



- 501 (2014). Observations of growth and postspawning survival of lumpfish *Cyclopterus*  
502 *lumpus* from mark-recapture studies. *Journal of Fish Biology*, 84(6), 1958–1963.
- 503 Kennedy J, Jónsson SP, Kasper JM, Ólafsson HG. (2014). Movements of female lumpfish  
504 (*Cyclopterus lumpus*) around Iceland. *ICES Journal of Marine Science* 72: 880-889.
- 505 Kennedy, J., Jónsson, S. P., Kasper, J. M., & Ólafsson, H. (2015). Movements of female  
506 lumpfish (*Cyclopterus lumpus*) around Iceland. *ICES Journal of Marine Science*, 72,  
507 880–889.
- 508 Kennedy, J., Jónsson, S. P., Ólafsson, H. G., & Kasper, J. M. (2016). Observations of vertical  
509 movements and depth distribution of migrating female lumpfish (*Cyclopterus lumpus*) in  
510 Iceland from data storage tags and trawl surveys. *ICES Journal of Marine Science*,  
511 73(4), 1160–1169
- 512 Kirkwood, G. P. (1983). Estimation of von Bertalanffy Growth Curve Parameters Using both  
513 Length Increment and Age–Length Data. *Canadian Journal of Fisheries and Aquatic*  
514 *Sciences*, 40(9), 1405–1411.
- 515 Kousoulaki K, Treasurer J, FitzGerald R. (2018). Fisheries for cleaner fish in Europe. in  
516 *Cleaner Fish Biology and Aquaculture Applications* (ed. JW Treasurer), pp. 330-357.  
517 5M Publishing Ltd., Sheffield.
- 518 Langella O. (2002) Populations 1.2.32. CNRS UPR9034. (available at:  
519 [http://bioinformatics.org/project/?group\\_id=84](http://bioinformatics.org/project/?group_id=84); last accessed 27 April 2018)
- 520 Lees, F., Baillie, M., Gettinby, G., & Revie, C. W. (2008). The efficacy of emamectin  
521 benzoate against infestations of *Lepeophtheirus salmonis* on Farmed Atlantic Salmon  
522 (*Salmo salar* L) in Scotland, 2002-2006. *PLoS ONE*, 3(2).
- 523 Li, Y. L., & Liu, J. X. (2018). StructureSelector: A web-based software to select and  
524 visualize the optimal number of clusters using multiple methods. *Molecular Ecology*  
525 *Resources*, 18(1), 176–177.
- 526 Lorance P., Cook R., Herrera J., de Sola L., Florin A. and Papaconstantinou C. (2015).  
527 *Cyclopterus lumpus*. The IUCN Red List of Threatened Species 2015  
528 e.T18237406A45078284. [Cited 27 Apr 2018.] Available from URL:  
529 <http://www.iucnredlist.org/details/18237406/1>
- 530 Macdonald, P. D. M., & Pitcher, T. J. (1979). Age-Groups from Size-Frequency Data: A  
531 Versatile and Efficient Method of Analyzing Distribution Mixtures. *Journal of the*  
532 *Fisheries Research Board of Canada*, 36(8), 987–1001.
- 533 Myers, R. A., & Sjare, B. (1995). An analysis of lumpfish from data on individual fishermen  
534 in the Newfoundland region. *DFO Atlantic Fisheries Research Document*, 95/96.
- 535 Nahdi, A.A., Garcia de Leaniz, C., King, A.J. (2016). Spatio-temporal variation in length-  
536 weight relationships and condition of the ribbonfish *Trichiurus lepturus* (Linnaeus,  
537 1758): Implications for fisheries management. *PloS ONE* 11: e0161989..
- 538 Page, R. D. M. (2003). Inferring Evolutionary Relationships: Visualizing Phylogenetic Trees  
539 Using TreeView. *Current Protocols in Bioinformatics*, 6(2), Unit 6.2.
- 540 Pampoulie C, Skirnisdottir S, Ólafsdottir G, Helyar SJ, Thorsteinsson V, Jónsson SP, Fréchet  
541 A, Durif CM, Sherman S, Lampart-Kałużniacka M. (2014). Genetic structure of the  
542 lumpfish *Cyclopterus lumpus* across the North Atlantic. *ICES Journal of Marine Science*  
543 71: 2390-2397.
- 544 Peakall, R., & Smouse, P. E. (2012). GenALEX 6.5: Genetic analysis in Excel. Population  
545 genetic software for teaching and research-an update. *Bioinformatics*, 28(19), 2537–  
546 2539.
- 547 Powell, A., Treasurer, J. W., Pooley, C. L., Keay, A. J., Lloyd, R., Imsland, A. K., & Garcia  
548 de Leaniz, C. (2017). Use of lumpfish for sea-lice control in salmon farming: Challenges  
549 and opportunities. *Reviews in Aquaculture*, 1–20.
- 550 Powell A., Pooley C., Scolamacchia M. and Garcia de Leaniz C. (2018). Review of lumpfish



- 551 biology. in *Cleaner Fish Biology and Aquaculture Applications* (ed. Treasurer J.), 6, 98-  
552 121. 5M Publishing Ltd. Sheffield.
- 553 Pritchard, J. K., Stephens, M., & Donnelly, P. (2000). Inference of population structure using  
554 multilocus genotype data. *Genetics*, 155(2), 945–959.
- 555 Puechmaille, S. J. (2016). The program structure does not reliably recover the correct  
556 population structure when sampling is uneven: Subsampling and new estimators  
557 alleviate the problem. *Molecular Ecology Resources*, 16(3), 608–627.
- 558 R Development Core Team. (2013). R Software. *R: A Language and Environment for*  
559 *Statistical Computing*.
- 560 Ratner, S., & Lande, R. (2001). Demographic and evolutionary responses to selective  
561 harvesting in populations with discrete generations. *Ecology*, 82(11), 3093–3104.
- 562 Reich, D. E., Feldman, M. W., & Goldstein, D. B. (1998). Statistical Properties of Two Tests  
563 that Use Multilocus Data Sets to Detect Population Expansions. *Molecular Biology and*  
564 *Evolution*, 16(4), 453–466.
- 565 Rice, W. R. (1989). Analyzing Tables of Statistical Tests. *Evolution*, 43(1), 223.  
566 <https://doi.org/10.2307/2409177>
- 567 Rosenberg, N. A. (2004). DISTRUCT: A program for the graphical display of population  
568 structure. *Molecular Ecology Notes*, 4(1), 137–138.
- 569 Rousset, F., 1997. Genetic differentiation and estimation of gene flow from F-statistics under  
570 isolation by distance. *Genetics* 145, 1219-1228.
- 571 Rousset, F. (2008). GENEPOP'007: A complete re-implementation of the GENEPOP  
572 software for Windows and Linux. *Molecular Ecology Resources*, 8(1), 103–106.
- 573 Skirmisdottir, S., Olafsdottir, G., Olafsson, K., Jendrossek, T., Lloyd, H. a. D., Helyar, S., ...  
574 Kasper, J. M. (2013). Twenty-two novel microsatellite loci for lumpfish (*Cyclopterus*  
575 *lumpus*). *Conservation Genetics Resources*, 5(1), 177–179.
- 576 Steinarsson A, Arnason T. (2018). Rearing of cleaner fish use in Iceland in *Cleaner Fish*  
577 *Biology and Aquaculture Applications* (ed. JW Treasurer), pp. 414-428. 5M Publishing  
578 Ltd., Sheffield.
- 579 Sundqvist, L., Keenan, K., Zackrisson, M., Prodöhl, P., & Kleinhans, D. (2016). Directional  
580 genetic differentiation and relative migration. *Ecology and Evolution*, 6(11), 3461–3475.
- 581 Torrissen, O., Jones, S., Asche, F., Guttormsen, A., Skilbrei, O.T., Nilsen, F., Horsberg, T.E.,  
582 Jackson, D., 2013. Salmon lice--impact on wild salmonids and salmon aquaculture.  
583 *Journal of Fish Diseases* 36, 171-194.
- 584 Treasurer, J. W. (2002). A review of potential pathogens of sea lice and the application of  
585 cleaner fish in biological control. *Pest Management Science* 58: 546–558.
- 586 Treasurer, J. W. (2018). An introduction to sea lice and the rise of cleaner fish. *Cleaner Fish*  
587 *Biology and Aquaculture Applications*. in *Cleaner Fish Biology and Aquaculture*  
588 *Applications* (Ed. Treasurer J.), 1, 3–24.
- 589 Treasurer J, Prickett R, Zietz M, Hempleman C, Garcia de Leaniz C. (2018). Cleaner fish  
590 rearing and deployment in the UK. in *Cleaner Fish Biology and Aquaculture*  
591 *Applications* (ed. JW Treasurer), pp. 376-391. 5M Publishing Ltd., Sheffield.
- 592 Van Oosterhout, C., Hutchinson, W. F., Wills, D. P. M., & Shipley, P. (2004). MICRO-  
593 CHECKER: Software for identifying and correcting genotyping errors in microsatellite  
594 data. *Molecular Ecology Notes*, 4(3), 535–538.
- 595 Wittwer C. and Treasurer J. (2018). Egg collection by hand-stripping and natural spawning  
596 of lumpfish *Cyclopterus lumpus* broodstock. in *Cleaner Fish Biology and Aquaculture*  
597 *Applications* (ed. Treasurer J.), 8, 147-160. 5M Publishing Ltd. Sheffield.
- 598

599 **Table 1.** Details of study sites sampled for lumpfish ( $N$ : sample size for genetic analysis;  $Nb$ :  
600 sample size for biometric analysis;  $N_A$  = mean number of alleles ( $\pm$  SE),  $N_E$  = mean number  
601 of effective alleles,  $N_{PA}$  = number of private alleles,  $H_O$  = observed heterozygosity,  $H_E$  =  
602 expected heterozygosity,  $F_{IS}$  = fixation index; \*denotes deviation from HWE due to  
603 heterozygote deficiency after Bonferroni correction at  $P < 0.0033$   
604

| Year | Country   | Site                | Lat.  | Long.  | $N$ | $Nb$ | $N_A$            | $N_E$        | $N_{PA}$       | $H_O$          | $H_E$          | $F_{IS}$       |                 |
|------|-----------|---------------------|-------|--------|-----|------|------------------|--------------|----------------|----------------|----------------|----------------|-----------------|
| 2016 | USA       | Frenchman Bay (FB)  | 44.33 | -68.15 | 30  | -    | mean<br>$\pm$ SE | 6.0<br>0.775 | 3.100<br>0.548 | 0.300<br>0.213 | 0.566<br>0.058 | 0.613<br>0.044 | 0.100<br>0.050  |
| 2016 | USA       | Cobscook Bay (CB)   | 44.90 | -67.05 | 30  | -    | mean<br>$\pm$ SE | 6.1<br>0.862 | 3.452<br>0.456 | 0.100<br>0.100 | 0.640<br>0.063 | 0.668<br>0.038 | 0.078<br>0.055  |
| 2016 | Canada    | Witless Bay (WB)*   | 47.21 | -52.69 | 30  | 30   | mean<br>$\pm$ SE | 6.7<br>0.870 | 3.459<br>0.425 | 0.400<br>0.163 | 0.630<br>0.049 | 0.673<br>0.036 | 0.080<br>0.050  |
| 2016 | Iceland   | Hafnir (Ha)         | 63.93 | -22.69 | 30  | -    | mean<br>$\pm$ SE | 5.5<br>0.500 | 2.971<br>0.222 | 0.000<br>0.000 | 0.637<br>0.041 | 0.643<br>0.031 | 0.019<br>0.050  |
| 2016 | Faroe Is. | Klasvík (KI)*       | 62.23 | -6.58  | 30  | -    | mean<br>$\pm$ SE | 6.8<br>0.359 | 3.713<br>0.453 | 0.200<br>0.133 | 0.668<br>0.049 | 0.700<br>0.030 | 0.065<br>0.047  |
| 2014 | Ireland   | Ventry Bay (VB)     | 52.20 | -10.12 | 30  | 26   | mean<br>$\pm$ SE | 6.8<br>0.389 | 3.255<br>0.346 | 0.100<br>0.100 | 0.647<br>0.056 | 0.658<br>0.038 | 0.032<br>0.050  |
| 2017 | Scotland  | Outer Hebrides (OH) | 58.16 | -6.38  | 30  | 18   | mean<br>$\pm$ SE | 6.5<br>0.453 | 3.247<br>0.448 | 0.000<br>0.000 | 0.623<br>0.055 | 0.644<br>0.041 | 0.060<br>0.036  |
| 2015 | England   | Weymouth (We)       | 50.61 | -2.46  | 30  | 30   | mean<br>$\pm$ SE | 5.8<br>0.593 | 2.979<br>0.423 | 0.000<br>0.000 | 0.607<br>0.062 | 0.597<br>0.059 | -0.012<br>0.053 |
| 2015 | England   | Guernsey (Gu)       | 49.47 | -2.59  | 30  | 30   | mean<br>$\pm$ SE | 5.6<br>0.476 | 3.068<br>0.431 | 0.000<br>0.000 | 0.618<br>0.083 | 0.608<br>0.055 | 0.032<br>0.084  |
| 2017 | Norway    | Namsen (Na)         | 59.15 | 6.01   | 21  | 21   | mean<br>$\pm$ SE | 6.3<br>0.539 | 3.080<br>0.470 | 0.100<br>0.100 | 0.576<br>0.076 | 0.614<br>0.050 | 0.105<br>0.078  |
| 2016 | Norway    | Averøy (Av)         | 63.05 | 7.48   | 30  | -    | mean<br>$\pm$ SE | 5.7<br>0.496 | 3.077<br>0.336 | 0.000<br>0.000 | 0.677<br>0.051 | 0.638<br>0.038 | -0.038<br>0.030 |
| 2015 | Norway    | Rogaland (Ro)       | 64.45 | 11.41  | 19  | -    | mean<br>$\pm$ SE | 4.5<br>0.342 | 2.625<br>0.291 | 0.000<br>0.000 | 0.600<br>0.071 | 0.594<br>0.026 | -0.056<br>0.046 |
| 2012 | Denmark   | Køge Bay (KB)*      | 55.46 | 12.18  | 30  | -    | mean<br>$\pm$ SE | 5.7<br>0.423 | 3.168<br>0.273 | 0.000<br>0.000 | 0.626<br>0.036 | 0.660<br>0.033 | 0.067<br>0.029  |
| 2017 | Sweden    | Öland (ÖI)*         | 55.72 | 16.39  | 16  | 16   | mean<br>$\pm$ SE | 4.7<br>0.423 | 2.838<br>0.320 | 0.100<br>0.100 | 0.548<br>0.077 | 0.592<br>0.061 | 0.110<br>0.073  |
| 2017 | Sweden    | Gotska Sandön (GS)* | 57.95 | 18.97  | 24  | 24   | mean<br>$\pm$ SE | 5.3<br>0.448 | 3.192<br>0.449 | 0.300<br>0.213 | 0.481<br>0.073 | 0.611<br>0.064 | 0.241<br>0.081  |

605

606 **Table 2.** Pairwise  $F_{ST}$  values (lower) and Bonferroni adjusted  $P$  values (upper; Bonferroni  
 607 correction  $P < 0.00022$ ) between 15 study populations of lumpfish distributed across the  
 608 natural range of the species using 10 microsatellite loci.  
 609

|    | FB    | CB    | WB    | Ha    | KI    | VB    | OH    | We    | Gu    | Na    | Av    | Ro    | KB    | Öl    | GS    |
|----|-------|-------|-------|-------|-------|-------|-------|-------|-------|-------|-------|-------|-------|-------|-------|
| FB |       | 0.036 | 0.000 | 0.000 | 0.000 | 0.000 | 0.000 | 0.000 | 0.000 | 0.000 | 0.000 | 0.000 | 0.000 | 0.000 | 0.000 |
| CB | 0.013 |       | 0.000 | 0.000 | 0.000 | 0.000 | 0.000 | 0.000 | 0.000 | 0.000 | 0.000 | 0.000 | 0.000 | 0.000 | 0.000 |
| WB | 0.030 | 0.030 |       | 0.000 | 0.000 | 0.000 | 0.000 | 0.000 | 0.000 | 0.000 | 0.000 | 0.000 | 0.000 | 0.000 | 0.000 |
| Ha | 0.130 | 0.112 | 0.117 |       | 0.000 | 0.000 | 0.000 | 0.000 | 0.000 | 0.000 | 0.000 | 0.000 | 0.000 | 0.000 | 0.000 |
| KI | 0.120 | 0.101 | 0.098 | 0.050 |       | 0.081 | 0.000 | 0.000 | 0.000 | 0.000 | 0.000 | 0.000 | 0.000 | 0.000 | 0.000 |
| VB | 0.117 | 0.093 | 0.102 | 0.042 | 0.011 |       | 0.000 | 0.000 | 0.000 | 0.018 | 0.000 | 0.000 | 0.243 | 0.000 | 0.000 |
| OH | 0.152 | 0.111 | 0.124 | 0.049 | 0.034 | 0.021 |       | 0.000 | 0.009 | 0.252 | 0.000 | 0.000 | 0.000 | 0.000 | 0.000 |
| We | 0.177 | 0.154 | 0.146 | 0.065 | 0.056 | 0.042 | 0.024 |       | 0.324 | 0.000 | 0.000 | 0.000 | 0.000 | 0.000 | 0.000 |
| Gu | 0.188 | 0.160 | 0.152 | 0.083 | 0.060 | 0.057 | 0.014 | 0.003 |       | 0.009 | 0.000 | 0.000 | 0.000 | 0.000 | 0.000 |
| Na | 0.157 | 0.121 | 0.128 | 0.080 | 0.035 | 0.020 | 0.004 | 0.029 | 0.029 |       | 0.036 | 0.000 | 0.018 | 0.000 | 0.000 |
| Av | 0.153 | 0.122 | 0.108 | 0.102 | 0.027 | 0.021 | 0.042 | 0.061 | 0.061 | 0.018 |       | 0.000 | 0.000 | 0.000 | 0.000 |
| Ro | 0.142 | 0.132 | 0.138 | 0.057 | 0.039 | 0.041 | 0.043 | 0.065 | 0.061 | 0.048 | 0.075 |       | 0.000 | 0.000 | 0.000 |
| KB | 0.113 | 0.085 | 0.095 | 0.034 | 0.021 | 0.004 | 0.028 | 0.048 | 0.067 | 0.022 | 0.037 | 0.046 |       | 0.000 | 0.000 |
| Öl | 0.194 | 0.139 | 0.176 | 0.087 | 0.129 | 0.115 | 0.097 | 0.105 | 0.113 | 0.126 | 0.152 | 0.149 | 0.088 |       | 0.216 |
| GS | 0.187 | 0.154 | 0.181 | 0.097 | 0.140 | 0.132 | 0.134 | 0.136 | 0.152 | 0.159 | 0.175 | 0.152 | 0.110 | 0.011 |       |

610  
 611  
 612  
 613  
 614  
 615

616 **Table 3.** Von Bertalanffy growth parameters ( $L_{\infty}$  = asymptotic length,  $t_0$  = initial condition  
617 parameter, and  $K$  = Brody growth rate or curvature parameter) and estimated mean weight at  
618 first maturity ( $\pm$  95 CI) for lumpfish from different genetically distinct regions.  
619

| Region          | Von Bertalanffy Growth parameters |                  |                         | Weight<br>at 1 <sup>st</sup> maturity (g) |
|-----------------|-----------------------------------|------------------|-------------------------|-------------------------------------------|
|                 | $L_{\infty}$ (mm)                 | $t_0$            | $K$ (yr <sup>-1</sup> ) |                                           |
| Baltic Sea      | 200 $\pm$ 6                       | 0.14 $\pm$ 0.02  | 0.51 $\pm$ 0.02         | 150 $\pm$ 12.5                            |
| East Atlantic   | 461 $\pm$ 14                      | 0.36 $\pm$ 0.23  | 0.56 $\pm$ 0.09         | 2,019 $\pm$ 265.5                         |
| English Channel | 571 $\pm$ 22                      | -1.08 $\pm$ 0.59 | 0.35 $\pm$ 0.20         | 3,007 $\pm$ 519.5                         |

620

621

622 **Figure legends.**

623

624 **Figure 1.** Lumpfish genetic structuring according to STRUCTURESELECTOR with (a)  
625 MedMedK and MedMeanK of  $K = 5$ , (b) MaxMedK and MaxMeanK of  $K = 6$ , and (c) TESS  
626 with  $K_{\max} = 10$  based on lowest mean DIC value. Each bar represents one individual with  
627 colours indicating probability of belonging to different genetically distinct groups.

628

629 **Figure 2.** Neighbourhood joining tree (based on Nei's Standard Genetic Distance) of 15  
630 lumpfish populations genotyped with 10 microsatellite loci.

631

632 **Figure 3.** Patterns of gene flow among lumpfish populations with colours indicating genetic  
633 groups, symbol size proportional to effective population size ( $N_e$ ), line thickness proportional  
634 to effective number of migrants ( $N_m$ ), and line direction indicative of significant asymmetric  
635 gene flow.

636

637 **Figure 4.** Length-weight relationships ( $\log_{10}$  scale) for lumpfish sampled in the Baltic Sea,  
638 English Channel, East Atlantic and West Atlantic.

639

640

641

642

643 **Figure 1.**

644

645

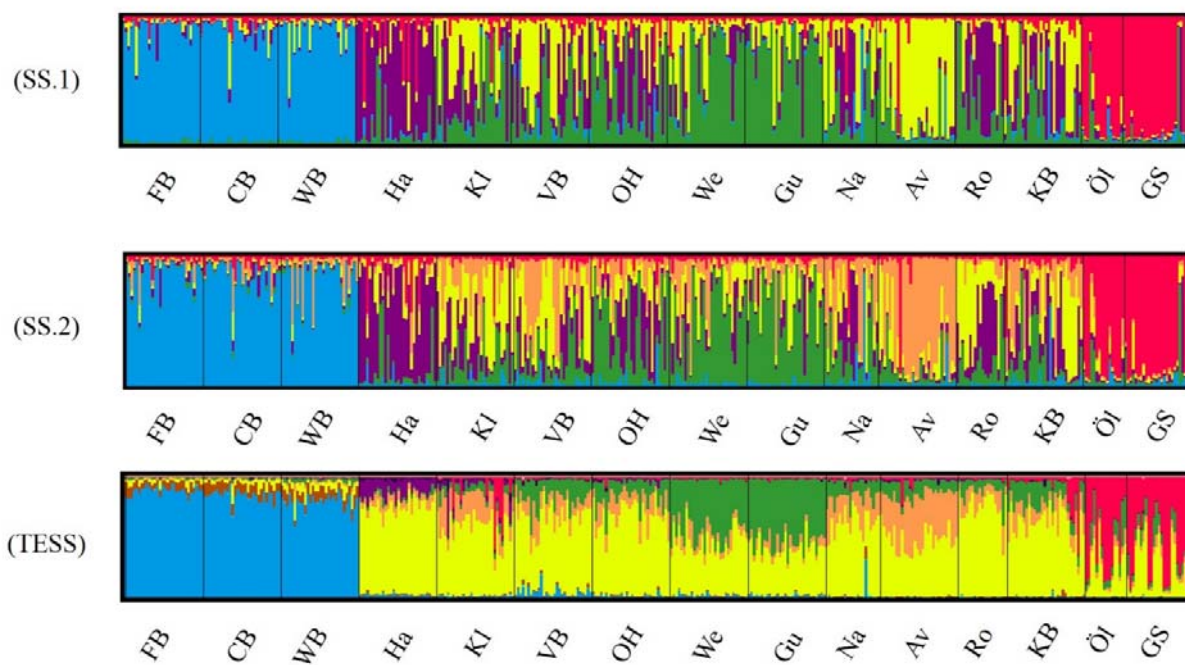

646

647

648

649

650

651

652

653



654 **Figure 2.**  
655  
656

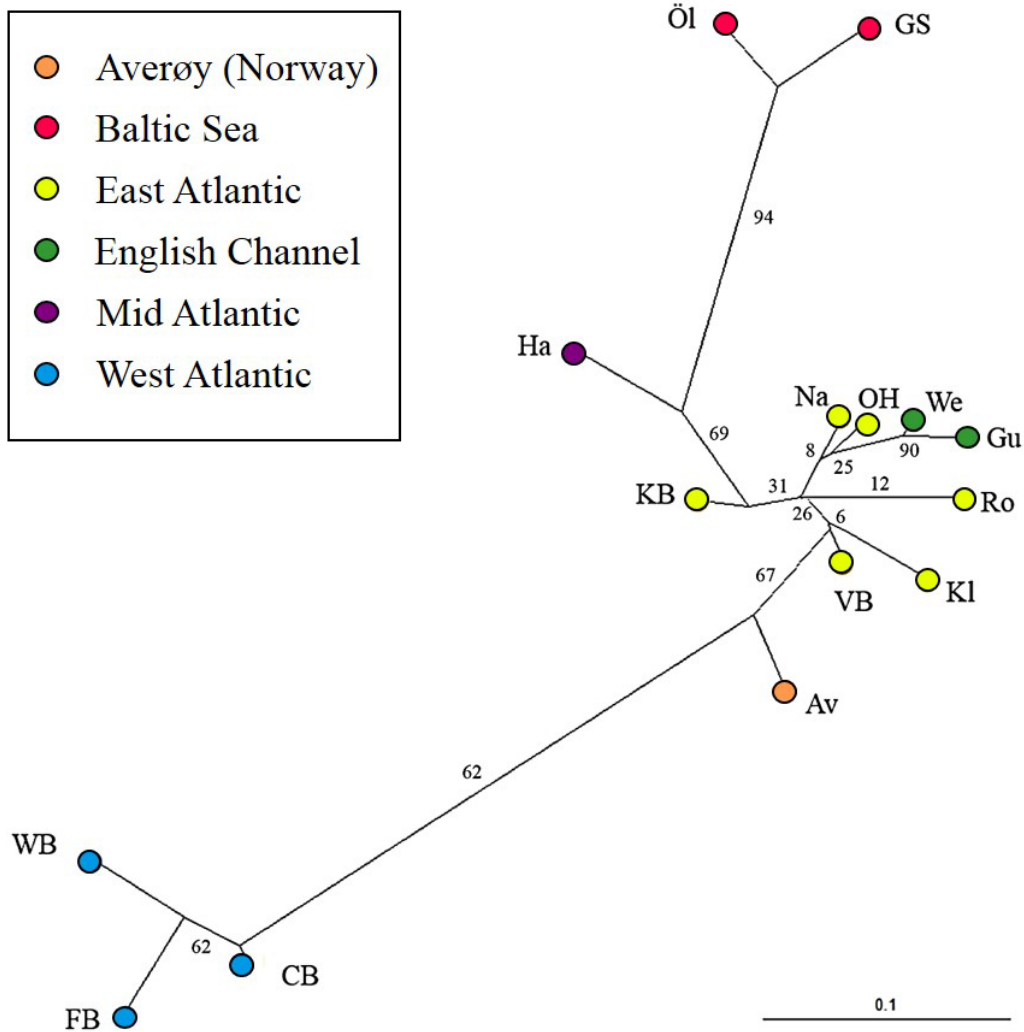

657  
658  
659

660 **Figure 3.**

661

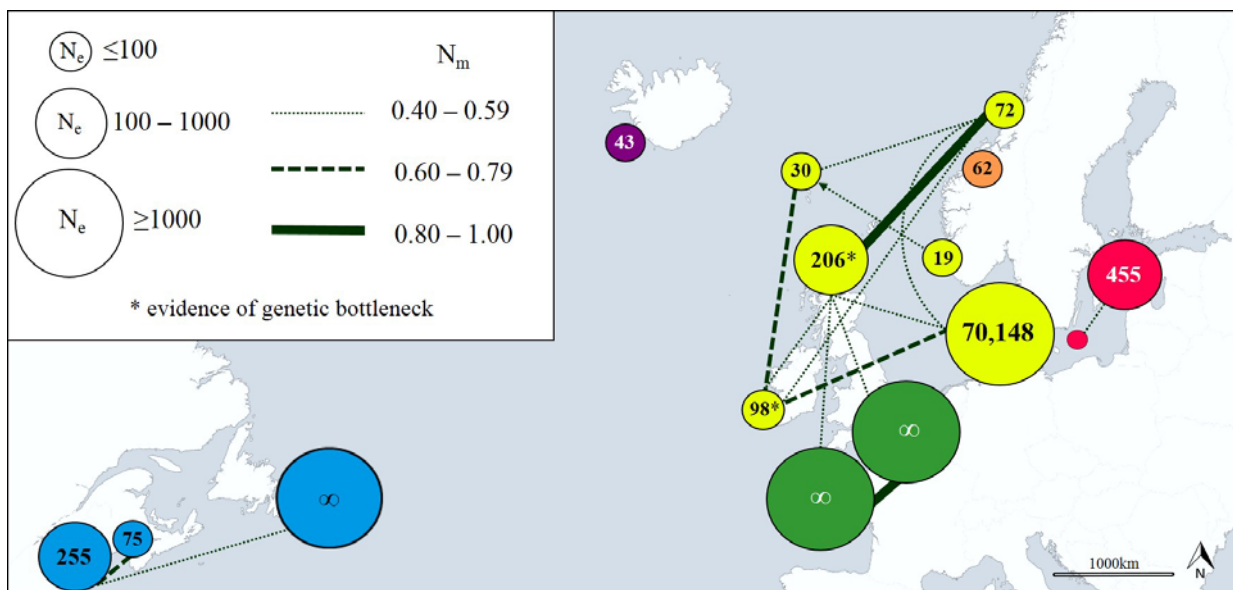

662 **Figure 4.**

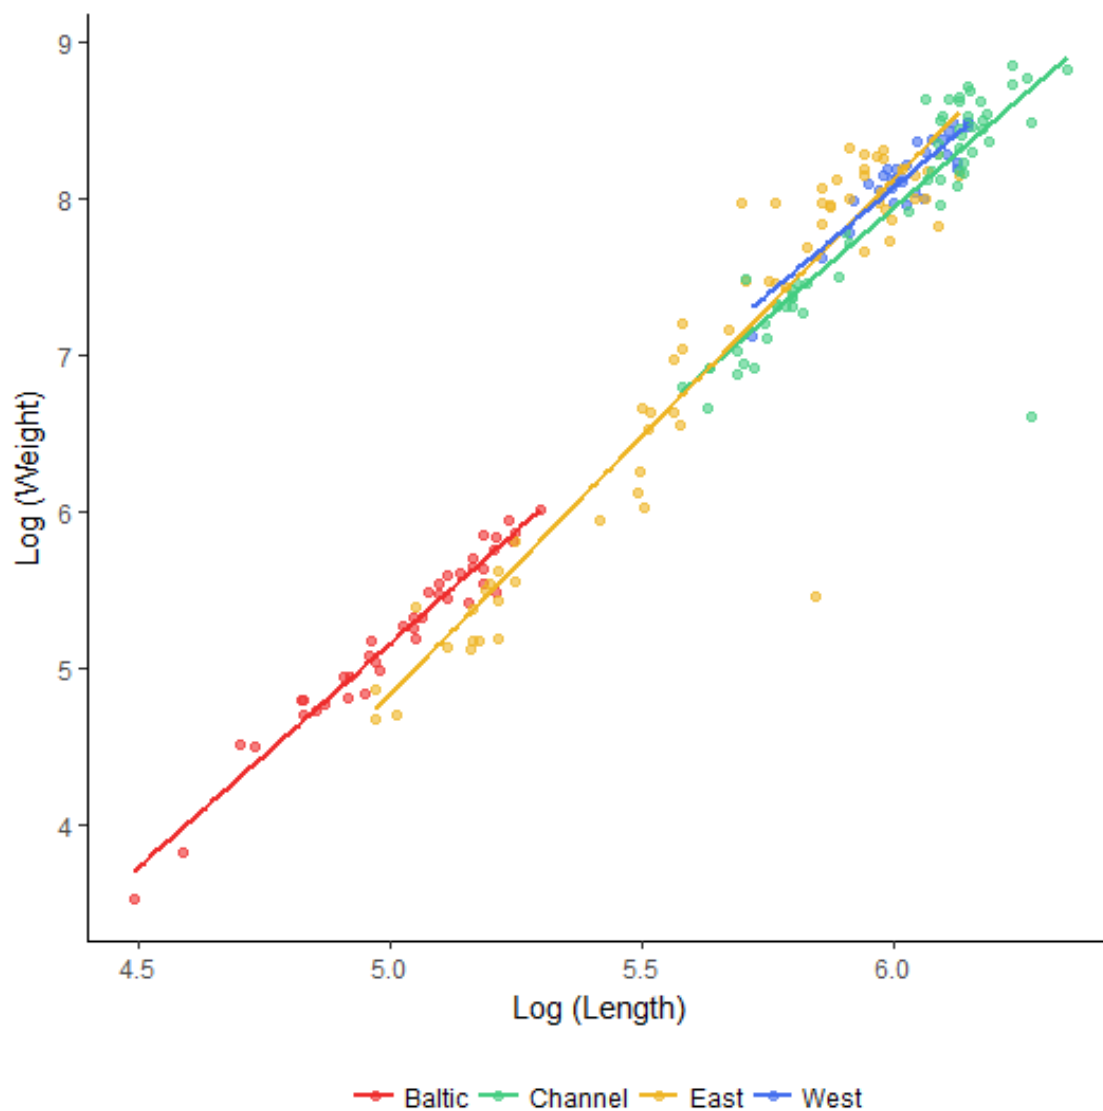

663  
664  
665  
666  
667
